# Supplementary material for: Effectiveness and feasibility of internet-based and mobile-based interventions for individuals experiencing bereavement: a systematic review protocol
Source: PubMed Central journal article supplement — BMJ Open. 2020 Apr 22;10(4):e036034. doi: 10.1136/bmjopen-2019-036034 (PMC7204864; doi:10.1136/bmjopen-2019-036034), 2020-04-22
Supplement: bmjopen-2019-036034.draft_revisions.pdf [file bmjopen-2019-036034.draft_revisions.pdf]

# BMJ Open

BMJ Open is committed to open peer review. As part of this commitment we make the peer review history of every article we publish publicly available.

When an article is published we post the peer reviewers' comments and the authors' responses online. We also post the versions of the paper that were used during peer review. These are the versions that the peer review comments apply to.

The versions of the paper that follow are the versions that were submitted during the peer review process. They are not the versions of record or the final published versions. They should not be cited or distributed as the published version of this manuscript.

BMJ Open is an open access journal and the full, final, typeset and author-corrected version of record of the manuscript is available on our site with no access controls, subscription charges or pay-per-view fees (<http://bmjopen.bmj.com>).

If you have any questions on BMJ Open's open peer review process please email [info.bmjopen@bmj.com](mailto:info.bmjopen@bmj.com)

# BMJ Open

## Effectiveness and feasibility of internet- and mobile-based interventions for individuals experiencing bereavement: A systematic review protocol

|                               |                                                                                                                                                                                                                                                                                                                                                                                                                                                                                                                                                                                                                                         |
|-------------------------------|-----------------------------------------------------------------------------------------------------------------------------------------------------------------------------------------------------------------------------------------------------------------------------------------------------------------------------------------------------------------------------------------------------------------------------------------------------------------------------------------------------------------------------------------------------------------------------------------------------------------------------------------|
| Journal:                      | <i>BMJ Open</i>                                                                                                                                                                                                                                                                                                                                                                                                                                                                                                                                                                                                                         |
| Manuscript ID                 | bmjopen-2019-036034                                                                                                                                                                                                                                                                                                                                                                                                                                                                                                                                                                                                                     |
| Article Type:                 | Protocol                                                                                                                                                                                                                                                                                                                                                                                                                                                                                                                                                                                                                                |
| Date Submitted by the Author: | 02-Dec-2019                                                                                                                                                                                                                                                                                                                                                                                                                                                                                                                                                                                                                             |
| Complete List of Authors:     | Luppa, Melanie; University of Leipzig Faculty of Medicine, Institute of Social Medicine, Occupational Health and Public Health<br>Loebner, Margrit; University of Leipzig Faculty of Medicine, Institute of Social Medicine, Occupational Health and Public Health<br>Pabst, Alexander<br>Schlapke, Christiane; University of Leipzig Faculty of Medicine<br>Stein, Janine; University of Leipzig Faculty of Medicine, Institute of Social Medicine, Occupational Health and Public Health<br>Riedel-Heller, Steffi; University of Leipzig, Institute of Social Medicine, Occupational Health and Public Health (ISAP), Medical Faculty |
| Keywords:                     | MENTAL HEALTH, Depression & mood disorders < PSYCHIATRY, PREVENTIVE MEDICINE                                                                                                                                                                                                                                                                                                                                                                                                                                                                                                                                                            |
|                               |                                                                                                                                                                                                                                                                                                                                                                                                                                                                                                                                                                                                                                         |

SCHOLARONE™  
Manuscripts

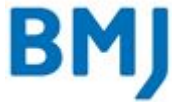

I, the Submitting Author has the right to grant and does grant on behalf of all authors of the Work (as defined in the below author licence), an exclusive licence and/or a non-exclusive licence for contributions from authors who are: i) UK Crown employees; ii) where BMJ has agreed a CC-BY licence shall apply, and/or iii) in accordance with the terms applicable for US Federal Government officers or employees acting as part of their official duties; on a worldwide, perpetual, irrevocable, royalty-free basis to BMJ Publishing Group Ltd ("BMJ") its licensees and where the relevant Journal is co-owned by BMJ to the co-owners of the Journal, to publish the Work in this journal and any other BMJ products and to exploit all rights, as set out in our [licence](#).

The Submitting Author accepts and understands that any supply made under these terms is made by BMJ to the Submitting Author unless you are acting as an employee on behalf of your employer or a postgraduate student of an affiliated institution which is paying any applicable article publishing charge ("APC") for Open Access articles. Where the Submitting Author wishes to make the Work available on an Open Access basis (and intends to pay the relevant APC), the terms of reuse of such Open Access shall be governed by a Creative Commons licence – details of these licences and which [Creative Commons](#) licence will apply to this Work are set out in our licence referred to above.

Other than as permitted in any relevant BMJ Author's Self Archiving Policies, I confirm this Work has not been accepted for publication elsewhere, is not being considered for publication elsewhere and does not duplicate material already published. I confirm all authors consent to publication of this Work and authorise the granting of this licence.

1  
2  
3 1 **Effectiveness and feasibility of internet- and mobile-based interventions for individuals**  
4  
5 2 **experiencing bereavement: A systematic review protocol**  
6

7 3

8 4

9  
10 5 Luppá, Melanie; Loebner, Margrit; Pabst, Alexander; Schlapke, Christine, Stein, Janine;

11  
12 6 Riedel-Heller, Steffi G.  
13

14 7

15  
16 8

17  
18 9

19  
20 10

21  
22 11

23  
24 12

25  
26 13

27  
28 14

29  
30  
31 15 Corresponding author:

32  
33 16 Melanie Luppá, PhD

34  
35 17 Institute of Social Medicine, Occupational Health and Public Health, University of Leipzig,  
36 18 Faculty of Medicine

37  
38 19 Philipp-Rosenthal-StraÙe 55

39  
40 20 04103 Leipzig

41  
42 21 Germany

43  
44 22 Email: [melanie.luppa@medizin-uni-leipzig.de](mailto:melanie.luppa@medizin-uni-leipzig.de)

45  
46 23 Phone: +49 341 9715406

47  
48 24 Word count: 3,678  
49  
50  
51  
52  
53  
54  
55  
56  
57  
58  
59  
60

## 25 ABSTRACT

26 Introduction: Internet- and mobile-based interventions (IMIs) provide an innovative and  
27 efficient self-management tool for mental health problems. This systematic review aims to  
28 summarise and critically evaluate studies addressing the effectiveness and feasibility of IMIs  
29 for normal and complicated grief in bereaved adults.

30 Methods and Analysis: The databases MEDLINE, Cochrane Library, PsycINFO, EMBASE and  
31 Web of Science and Google Scholar (for “grey” literature) will be systematically searched for  
32 feasibility studies or randomized controlled trials of IMIs for bereaved adults who were  
33 experiencing normal/complicated grief. Data will be extracted and evaluated independently  
34 by two reviewers from studies eligible for inclusion. Quality of evidence will be assessed, and  
35 results will be synthesized qualitatively and pooled meta-analytically, if sufficient outcome  
36 data are available. PRISMA standards and GRADE methodology will be used.

37 Ethics and Dissemination: No primary data will be collected; thus, ethical approval is not  
38 required. The results will be disseminated through a peer-reviewed publication and  
39 conference presentations.

40 PROSPERO registration number: CRD42019131428

41 Keywords: grief, bereavement, systematic review, internet- and mobile-based, effectiveness,  
42 feasibility

## 44 Strengths and limitations of this study

- 45 - first study which provides a comprehensive summary of studies investigating  
46 effectiveness and feasibility of internet- and mobile-based interventions (IMIs) for  
47 normal and complicated grief in bereaved adults
- 48 - possibility of usage of these IMIs in healthcare as additional intervention tools as well  
49 as low-threshold treatment options
- 50 - application with the necessary caution of these IMIs seems to be required not to  
51 interfere with natural grief processes

## 56 Background

57  
58 Self-management is an widely used approach within the medical health care system for  
59 improving patients' knowledge, capabilities and skills in managing their health problems.  
60 Internet- and mobile-based interventions (IMIs) provide an innovative and efficient self-  
61 management tool for mental health problems. In recent years, web-based self-management  
62 interventions have gained increasing attention as effective supplementary treatment  
63 elements to standard mental health treatment [1].

64 The effectiveness of IMIs has been shown for treating depression (e.g. [2-4]), anxiety (e.g.  
65 [5,6]), post-traumatic stress disorder (PTSD; e.g. [7-9]), and other mental health problems  
66 [1]. However, less is currently known about IMIs for individuals experiencing normal or  
67 complicated grief.

68 In general, grief is defined as a typical reaction to the loss of a significant other [10] , and is  
69 associated with symptoms such as intense subjective distress, loneliness, and somatic  
70 symptoms, e.g. tightness of the throat or need for sighing [11,12]. Recently, the concept of  
71 an abnormal reaction to loss has been proposed and is included as a disorder in the  
72 *Diagnostic Statistical Manual of Mental Disorders*, 5<sup>th</sup> Edition (*DSM-V*) and is expected to be  
73 included in the *International Statistical Classification of Diseases and Related Health*  
74 *Problems*, 11<sup>th</sup> Revision (*ICD-11*) as a new diagnosis. The disorders Complicated, Traumatic,  
75 or Prolonged Grief (subsequently summarized under complicated grief) and Complicated  
76 Grief are described as "a syndrome of prolonged and intense grief that is accompanied by  
77 complications that derail the progress of grief" [13]. In contrast to uncomplicated grief,  
78 clinically significant impairment in social, occupational, or other important areas of  
79 functioning must be present [13,14]. The diagnosis of complicated grief is given only after a  
80 period of six months following the index loss event if the person is still suffering from  
81 separation stress as well as cognitive, emotional, and behavioral symptoms [14].

82 Because grief can affect many areas of life [15,16] and is one of the major contributors to  
83 the development of mental health disorders, providing IMIs as a low-threshold treatment  
84 option may enable more people to receive treatment than through face-to-face  
85 interventions alone [17] to prevent the development of mental health disorders. Major  
86 Depression, Generalized Anxiety Disorder, and Post-Traumatic Stress Disorder are  
87 particularly closely related to the symptoms of complicated grief, but differences between  
88 the disorders have also been reported [14,18].

1  
2  
3 89 To date, a number of IMIs for bereavement problems exist in the international research  
4  
5 90 literature. Internet-based Cognitive Behavioral Therapy (CBT) interventions were reported to  
6  
7 91 be effective in treating patients with complicated grief [19] but not for those with  
8  
9 92 uncomplicated grief [20]. Some researchers have urged caution in implementing  
10  
11 93 interventions too early or across a wide range of bereavement-related distress so as to not  
12  
13 94 interfere with natural grief processes [21,22]. One study showed that IMIs for PTSD improve  
14  
15 95 symptoms of complicated grief [23]. To our knowledge, there are no previous systematic  
16  
17 96 reviews summarizing the effectiveness and feasibility of IMIs for bereaved individuals – for  
18  
19 97 normal as well as complicated grief. The results of this review and meta-analysis will  
20  
21 98 therefore address this gap in the literature. This protocol describes the rationale and design  
22  
23 99 of the planned systematic review and meta-analysis.

100

## 101 OBJECTIVES

102 The planned review aims to systematically evaluate and synthesize the evidence base of  
103 randomized controlled-trials (RCT)s reporting, the effectiveness of IMIs (i.e. improvement of  
104 objective parameters), and the feasibility of IMIs (e.g. usability, satisfaction, acceptability,  
105 understandability and usefulness) for individuals aged 18 years and older who experienced  
106 the death of a significant other. Depending on the number of eligible studies, assessment  
107 tools, and quality of the studies reported, we will also combine data across RCTs to estimate  
108 pooled effect sizes for the considered outcomes.

109

110

## 111 METHODS AND ANALYSIS

112 This protocol outlines the strategies for conducting a systematic review and meta-analysis of  
113 RCTs which examined the effectiveness of IMIs for bereavement. It is based on the Preferred  
114 Reporting Items for Systematic Reviews and Meta-Analysis (PRISMA) for systematic review  
115 protocols (PRISMA-P) guidelines [24,25]. The protocol describes the planned strategy to  
116 systematically evaluate and synthesize data from randomized controlled trials and feasibility  
117 studies on IMIs for bereaved individuals. We will apply the four-phase PRISMA flow diagram  
118 (figure 1) for our study selection process.

119

120

121

122 Eligibility criteria

1  
2  
3 123 The systematic review will be divided into two parts: effectiveness studies and feasibility  
4  
5 124 studies on IMIs (study design criteria) which include adults (18 years and older), who  
6  
7 125 experienced the death of a significant other and were suffering from normal or complicated  
8  
9 126 grief (participant criteria). Any measures of effectiveness (i.e. improvement of objective  
10  
11 127 parameters) and feasibility (e.g. usability, satisfaction, acceptability, understandability and  
12  
13 128 usefulness) (outcome criteria) of IMIs related to bereavement will be included. Onset data  
14  
15 129 from clinician-rated scales will be prioritized over self-report questionnaires. The  
16  
17 130 intervention must have been a psychological intervention according to Kampling et al. [26]  
18  
19 131 criteria: cognitive behavioral therapy (CBT), psychodynamic psychotherapy, behavior  
20  
21 132 therapy or behavior modification, systemic therapy, third wave cognitive behavioral therapy,  
22  
23 133 humanistic therapy, integrative therapy or to other psychological-orientated interventions  
24  
25 134 and must have been provided in an online setting (intervention criteria). In RCTs, the  
26  
27 135 comparison group must be either 'treatment as usual', 'waiting list', 'attention placebo'  
28  
29 136 (inactivity on the part of both researchers and participants), or 'psychological placebo'  
30  
31 137 (activity on the part of participants and inactivity of researchers). We will consider articles  
32  
33 138 that are written in either English or German (language criteria). The literature search will not  
34  
35 139 be restricted by publication date.

#### 35 140 Information sources and search strategy

36  
37 141 Systematic literature searches will be conducted in the databases MEDLINE (PubMed  
38  
39 142 interface), Cochrane Library (Cochrane Database of Systematic Reviews, Cochrane Central  
40  
41 143 Register of Controlled Trials (CENTRAL), Cochrane Methodology Register), PsycINFO,  
42  
43 144 EMBASE, Web of Science (Science and Social Science Citation Index) and Google Scholar (for  
44  
45 145 "grey" literature) by ML and CS independently. A combination of the following search terms  
46  
47 146 will be used: (1) bereavement or widowhood or grief; and (2) online or web or computer or  
48  
49 147 mobile or e-health or internet; and (3) intervention or psychotherapy or cognitive  
50  
51 148 behavioural therapy or CBT. If feasible, medical subject headings (MeSH) will be used as  
52  
53 149 search terms. The finalized MEDLINE search strategy will be adapted to the syntax and  
54  
55 150 subject headings specifications of the other databases. We will initially screen titles and  
56  
57 151 abstracts for eligibility. Full texts will then be assessed for criteria, and the reference lists of  
58  
59 152 included articles and systematic reviews will be hand searched to identify further potentially  
60  
153 relevant studies. Finally, we will conduct a grey literature search for unpublished studies  
154  
using Google and Google Scholar with the above-named search terms. If applicable and



1  
2  
3 155 necessary, we will contact researchers directly to gather further relevant non-published  
4  
5 156 data. The searches will be re-run just before the final analyses so that more recent studies  
6  
7 157 can be retrieved.

8  
9 158  
10 159 Data management

11  
12 160 References and data will be managed using the Review Manager (RevMan) software package  
13  
14 161 version 5.3 (by the Nordic Cochrane Centre, The Cochrane Collaboration, Copenhagen,  
15  
16 162 Denmark, 2014). RevMan is specifically designed for managing and analyzing systematic  
17  
18 163 review data from bibliographical management to data synthesis. If feasible, additional data  
19  
20 164 analyses and meta-analysis will be conducted using Stata 13.1 SE (StataCorp LP, College  
21  
22 165 Station, Texas, USA).

23 166  
24  
25 167 Selection process

26  
27 168 All titles and abstracts of articles will be screened independently by two reviewers (ML, CS).  
28  
29 169 At this stage, articles will be divided into potentially relevant, irrelevant or uncertain.  
30  
31 170 Reasons for exclusion of irrelevant articles will be given. Potentially relevant and uncertain  
32  
33 171 articles will be read in full text independently by ML and CS, and study eligibility based on  
34  
35 172 the established criteria specified above will be assessed. At each stage of the selection  
36  
37 173 process, any discrepancies will be discussed between the two reviewers. When discrepancies  
38  
39 174 cannot be resolved, input from a third senior researcher (SRH) will be obtained.

40 175  
41 176 Data collection process and data items

42  
43 177 A standardized data extraction form will be used to extract data from included studies.  
44  
45 178 Extracted data will include study characteristics, participant characteristics, methodological  
46  
47 179 factors and outcome data. A pilot version of the data extraction form will be tested  
48  
49 180 independently by the two reviewers (ML, CS) on a subsample of relevant studies to ensure  
50  
51 181 correct extraction of all relevant data. Difficulties with data extraction will be discussed and  
52  
53 182 the form will be adopted accordingly. Data from each study will be extracted by both  
54  
55 183 reviewers (ML, CS) independently, and reliability of data extraction will be checked in a  
56  
57 184 random sample of studies. Discrepancies between the two reviewers will be discussed with a  
58  
59 185 senior researcher (SRH). Missing data will be requested from study authors.

60 186

1  
2  
3 187 The following data will be extracted:  
4

- 5 188 (1) Study identification items: e.g. first author, year of publication, country  
6  
7 189 (2) Study design characteristics: e.g. sample size, recruitment strategy, interventions  
8  
9 190 design/type, control group, type of assessment, inclusion/exclusion criteria, duration  
10  
11 191 of intervention, length of follow-up assessments  
12  
13 192 (3) Participants characteristics: e.g. mean age, age range, gender  
14  
15 193 (4) Methodological aspects: risk of bias, study limitations  
16  
17 194 (5) Outcomes: effectiveness (i.e. improvement of objective parameters) and feasibility  
18 195 (e.g. usability, satisfaction, acceptability, understandability and usefulness); (serious)  
19  
20 196 adverse events (e. g. disability, hospitalization, death); onset data from clinician-  
21  
22 197 rated scales will be prioritized over self-report questionnaires. All different time  
23  
24 198 frames of follow-up assessments will be included.  
25  
26 199

27 200 Quality assessment

28  
29 201 The methodological quality of included studies will be assessed by two researchers (ML, CS)  
30  
31 202 independently using the Cochrane Collaboration Tool for Assessing Risk of Bias in RCTs [27].  
32  
33 203 As recommended, each study will be assessed in the following domains: (1) selection bias,  
34  
35 204 i.e. descriptions of the (1a) method of randomisation and (1b) concealment of allocation; (2)  
36  
37 205 performance bias, i.e. description of the methods of blinding participants and researchers;  
38  
39 206 (3) detection bias, i.e. description of the methods of blinding outcome assessment; (4)  
40  
41 207 attrition bias, i.e. description of incomplete outcome data; (5) reporting bias, i.e. description  
42  
43 208 of selective outcome reporting; and (6) other bias, i.e. description of important concerns  
44  
45 209 about other biases. Studies will be rated as 'high', 'low', or 'unclear'. These assessments will  
46  
47 210 be used to inform the corresponding GRADE assessment of study limitations (see table 5.6 of  
48  
49 211 the Grades of Recommendation, Assessment, Development and Evaluation (GRADE)  
50  
51 212 handbook [28]. Specifically, 'low risk of bias' would indicate 'no limitation'; 'unclear risk of  
52  
53 213 bias' would indicate either 'no limitation' or 'serious limitation'; and 'high risk of bias' would  
54  
55 214 indicate either 'serious limitation' or 'very serious limitation' in the GRADE approach. Any  
56  
57 215 disagreement between the two reviewers will be resolved by discussions with involvement  
58  
59 216 of a third review author where necessary. Study authors will be contacted for further  
60  
217 methodological information if needed. In the risk of bias table, results of the judgements will  
218  
be shown for each domain.

1  
2  
3 219  
4  
5 220 Data synthesis and presentation  
6  
7 221 A detailed description of the results for all included studies will be provided in text and  
8  
9 222 tables. Characteristics of selected studies will be listed and qualitatively described (see listed  
10  
11 223 parameter in “data collection process”). Characteristics of the study, sample, intervention  
12  
13 224 and control condition will be presented first, followed by outcome measurements, effect  
14  
15 225 sizes, and overall results. We will provide a narrative synthesis and if appropriate, a  
16  
17 226 quantitative meta-analysis using funnel and forest plots and pooled statistics. If feasible,  
18  
19 227 results of pooled age- and gender-specific outcomes will be reported.

20 228 Data analyses will be performed using Review Manager 5.3 software from the Cochrane  
21  
22 229 Collaboration Tool for Implementing the Characteristics of Studies (Review Manager  
23  
24 230 (RevMan) [Computer program], 2014).

25 231  
26  
27 232 Meta-analysis  
28  
29 233 Meta-analysis of pooled data will be based on the assessment of clinical, methodological and  
30  
31 234 statistical heterogeneity. According Cochrane standards, meta-analysis will not be  
32  
33 235 performed if high levels of heterogeneity and/or variation in the effects of the interventions  
34  
35 236 are present.

36 237 Heterogeneity in study characteristics will be evaluated using forest plots and  $I^2$  statistics. An  
37  
38 238  $I^2$  of >60% indicates substantial heterogeneity and requires exploration of the sources of  
39  
40 239 heterogeneity in subgroups of studies (Higgins et al. 2011). Depending on the level of  
41  
42 240 observed heterogeneity, fixed-effect, random-effect or mixed-effect models will be used to  
43  
44 241 estimate the pooled effects on outcomes and to quantify the uncertainty of these estimates.  
45  
46 242 If sufficient data are available, subgroup analyses based on the content and form of  
47  
48 243 intervention will be performed. Finally, in order to evaluate the association of  
49  
50 244 sociodemographic variables with pooled effect sizes, meta-regression models will be fitted.  
51  
52 245 We will follow the Cochrane Handbook for Systematic Reviews of Interventions (Higgins 2011)  
53  
54 246 to deal with missing data.

55 247  
56  
57 248  
58  
59 249  
60  
250 Discussion

1  
2  
3 251 The planned systematic review will provide a comprehensive summary of the effectiveness  
4  
5 252 and feasibility of internet- and mobile-based interventions for adults who suffer from  
6  
7 253 bereavement.

8  
9 254 If treatment programs for bereavement which utilize either the Internet or mobile phone  
10  
11 255 technology show effectiveness and feasibility, this therapeutic delivery method has the  
12  
13 256 potential to become an additional intervention tool. Internet-based interventions can reach  
14  
15 257 more people than face-to-face interventions (Muñoz 2010). Their cost-effectiveness for  
16  
17 258 depression [29] and anxiety disorders [30,31] have also been demonstrated. Because of a  
18  
19 259 prevalence rate of 3.7% for complicated grief in Germany [32], a low-threshold treatment  
20  
21 260 option would enable the provision of adequate care to more bereaved adults.

22  
23 261 If there are an insufficient number of studies that have examined gender and age  
24  
25 262 differences, this will be discussed in terms of a need for future research. Second, this review  
26  
27 263 could motivate other researchers to construct and test in randomized trials new or modified  
28  
29 264 internet- or mobile-based interventions for bereaved adults.

30  
31 265

32  
33 266

34  
35 267

36 268 Amendments

37 269 In the event of protocol amendments, we will provide the date, a description of and  
38  
39 270 rationale for of each amendment.

40  
41 271

42 272 Abbreviations

43 273 CBT – cognitive behavioural therapy

44 274 CENTRAL - Cochrane Central Register of Controlled Trials

45 275 GRADE - Grades of Recommendation, Assessment, Development and Evaluation

46 276 IMI - Internet- and mobile-based interventions

47 277 PRISMA - Preferred Reporting Items for Systematic Reviews and Meta-Analysis

48 278 PTSD - post-traumatic stress disorder

49 279 RCT - randomized controlled-trials

50  
51 280

52 281 Declarations section

53 282 Ethics Approval and Consent to Participate

1  
2  
3 283 Ethical approval and consent to participate are not required as no primary data will be  
4  
5 284 collected. The results of this systematic review are intended to be published in an  
6  
7 285 international peer-reviewed journal. Results may also be presented at relevant professional  
8  
9 286 conferences and meetings.

10 287

11  
12 288 Availability of supporting data

13  
14 289 Not applicable

15  
16 290

17  
18 291 Competing interest

19  
20 292 None declared

21  
22 293

23  
24 294 Funding

25 295 This publication is part of the AgE-health-study and was funded by the German Federal  
26  
27 296 Ministry of Education and Research (reference number: 01GY1613). The funding source had no  
28  
29 297 role in the design of the study and will not have any role in its execution, analyses, interpretation of the  
30  
31 298 data, or decision to submit results

32  
33 299

34  
35 300

36 301 Author Contributions

37  
38 302 ML and CS are the guarantors of the systematic review. ML and CS drafted the manuscript.

39  
40 303 All authors contributed to the conception and design of the review. ML, MLö and CS

41  
42 304 developed the search strategy. ML, MLö, AP and CS developed the methodological

43  
44 305 approach. ML, MLö and SRH critically revised the protocol for important intellectual content.

45  
46 306

47 307 Acknowledgement

48  
49 308 Not applicable

50  
51 309

52  
53 310 Author's information

54  
55 311 All authors approved the final version of the manuscript.

56  
57 312

58  
59 313

60 314

1  
2  
3 315  
4  
5 316  
6  
7 317  
8  
9 318  
10  
11 319  
12  
13 320  
14  
15 321  
16  
17 322  
18  
19 323  
20  
21 324  
22  
23  
24  
25  
26  
27  
28  
29  
30  
31  
32  
33  
34  
35  
36  
37  
38  
39  
40  
41  
42  
43  
44  
45  
46  
47  
48  
49  
50  
51  
52  
53  
54  
55  
56  
57  
58  
59  
60

For peer review only

## 325 References

326 Brand D, Morgan D, et al. Measuring injury risk factors: question reliability in a statewide  
327 sample. *Inj Prev* 2000;6:148–50.

328  
329 [1] Stein J, Röhr S, Luck T, et al. Indikationen und Evidenz von international entwickelten  
330 Online-Coaches zur Intervention bei psychischen Erkrankungen – ein Meta-Review. *Psychiat  
331 Prax* 2018;45:7–15.

332 [2] Richards D, Duffy D, Burke J, et al. Supported Internet-Delivered Cognitive Behavior  
333 Treatment for Adults with Severe Depressive Symptoms: A Secondary Analysis. *JMIR Ment  
334 Health* 2018;5:e10204.

335 [3] Twomey C, O'Reilly G, Meyer B. Effectiveness of an individually-tailored computerised  
336 CBT programme (Deprexis) for depression: A meta-analysis. *Psychiat res* 2017;256:371–7.

337 [4] Karyotaki E, Ebert DD, Donkin L, et al. Do guided internet-based interventions result in  
338 clinically relevant changes for patients with depression? An individual participant data meta-  
339 analysis. *Clin Psychol Rev* 2018;63:80–92.

340 [5] Morgan C, Mason E, Newby JM, et al. The effectiveness of unguided internet cognitive  
341 behavioural therapy for mixed anxiety and depression. *Internet Interv* 2017;10: 47–53.

342 [6] Morris J, Firkins A, Millings A, et al. Internet-delivered cognitive behavior therapy for  
343 anxiety and insomnia in a higher education context. *Anxiety, stress, and coping*  
344 2016;29:415–31.

345 [7] Lange A, van de Ven J, Schrieken B. Interapy: treatment of post-traumatic stress via the  
346 internet. *Cogn Behav Ther* 2003;32:110–24.

347 [8] Sijbrandij M, Kunovski I, Cuijpers P. Effectiveness of internet-delivered cognitive  
348 behavioral therapy for posttraumatic stress disorder: A systematic review and meta-analysis.  
349 *Dep Anx* 2016;33:783–91.

350 [9] Spence J, Titov N, Dear BF, et al. Randomized controlled trial of Internet-delivered  
351 cognitive behavioral therapy for posttraumatic stress disorder. *Dep Anx* 2011;28:541–50.

352 [10] Lammer K. Trauer verstehen. Formen, Erklärungen, Hilfen. 4. Aufl. Berlin: Springer 2014.  
353 Online verfügbar unter <http://dx.doi.org/10.1007/978-3-642-41667-5>.

354 [11] Jackson EN. Understanding grief. *Pastoral Psychol* 1957;8:41–8.

355 [12] Lindemann E. Symptomatology and management of acute grief. *Am J Psychiat*  
356 1944;101:141–8.

- 1  
2  
3 357 [13] Zisook S, Simon NM, Reynolds CF, et al. Bereavement, complicated grief, and DSM, part  
4 358 2: complicated grief. *J Clin Psychiat* 2010;71:1097–8.
- 6 359 [14] Prigerson HG, Horowitz MJ, Jacobs SC, et al. Prolonged grief disorder: Psychometric  
8 360 validation of criteria proposed for DSM-V and ICD-11. *PLoS Med* 2009;6:e1000121.
- 10 361 [15] Huttu MH, Armstrong DS, Myers JA, et al. Grief intensity, psychological well-being, and  
12 362 the intimate partner relationship in the subsequent pregnancy after a perinatal loss. *JOGNN*  
14 363 2015;44:42–50.
- 16 364 [16] O'Connor M, Nickerson A, Aderka IM, et al. The temporal relationship between change  
18 365 in symptoms of prolonged grief and posttraumatic stress following old age spousal  
19 366 bereavement. *Dep Anx* 2015;32:335–40.
- 21 367 [17] Muñoz RF. Using evidence-based internet interventions to reduce health disparities  
23 368 worldwide. *J Med Internet Res* 2010;12:e60.
- 25 369 [18] Boelen PA, van de Schoot R, van den Hout MA, et al. Prolonged grief disorder,  
27 370 depression, and posttraumatic stress disorder are distinguishable syndromes. *J Aff Dis*  
29 371 2010;125: 374-8.
- 31 372 [19] Wagner B, Knaevelsrud C, Maercker A. Internet-based cognitive-behavioral therapy for  
33 373 complicated grief: a randomized controlled trial. *Death studies* 2006;30:429–453.
- 35 374 [20] van der Houwen K, Schut H, van den Bout J, et al. The efficacy  
37 375 of a brief internet-based self-help intervention for the bereaved. *Behav Res*  
38 376 *Ther* 2010;48:359-67.
- 40 377 [21] Kleinman A. Culture, bereavement, and psychiatry. *Lancet* 2012;379:608–9.
- 42 378 [22] Schut H, Stroebe MS, Van den Bout J, et al. The efficacy of bereavement interventions:  
43 379 Determining who benefits. 2001. In: Stroebe MS, Hansson RO, Stroebe W, Schut H  
44 380 (Eds.), *Handbook of bereavement research: Consequences, coping, and care* (pp. 705-737).  
46 381 Washington, DC, US: American Psychological Association.
- 48 382 [23] Kersting A, Dölemeyer R, Steinig J, et al.  
50 383 Brief Internet-based intervention reduces posttraumatic stress and prolonged  
51 384 grief in parents after the loss of a child during pregnancy: a randomized  
53 385 controlled trial. *Psychother Psychosom* 2013;82:372-81.
- 55 386 [24] Moher D, Liberati A, Tetzlaff J. Preferred reporting items for systematic reviews and  
57 387 meta-analysis: the PRISMA statement. *BMJ* 2009;339:b2535.
- 59  
60



- 1  
2  
3 388 [25] Shamseer L, Moher D, Clarke M, et al. Preferred reporting items for systematic review  
4  
5 389 and meta-analysis protocols (PRISMA-P) 2015: elaboration and explanation. *BMJ (Clin Res*  
6  
7 390 *ed.)* 2015;350:g7647.
- 8  
9 391 [26] Kampling H, Baumeister H, Jaeckel WH, et al. Prevention of depression in chronically  
10  
11 392 physically ill adults. Cochrane Systematic Review - Intervention – Protocol.  
12  
13 393 <https://doi.org/10.1002/14651858.CD011246>
- 14  
15 394 [27] Higgins JPT, Altman DG, Gøtzsche PC, et al. The Cochrane Collaboration's tool for  
16  
17 395 assessing risk of bias in randomised trials. *BMJ (Clin Res ed.)* 2011;343: d5928.
- 18  
19 396 [28] Guyatt GH, Oxman AD D, Vist GE, et al. GRADE: an emerging consensus on rating quality  
20  
21 397 of evidence and strength of recommendations. *BMJ (Clin Res ed.)* 2008;336:924–6.
- 22  
23 398 [29] Gerhards SAH, de Graaf LE, Jacobs LE, et al. Economic evaluation of online computerised  
24  
25 399 cognitive behavioural therapy without support for depression in primary care: a randomised  
26  
27 400 trial. *British J Psych* 2010; 196:310–318.
- 28  
29 401 [30] Hedman E, Andersson E, Lindefors N, et al. Cost-effectiveness and long-term  
30  
31 402 effectiveness of internet-based cognitive behaviour therapy for severe health anxiety.  
32  
33 403 *Psychol Med* 2013; 43:363–74.
- 34  
35 404 [31] Hedman E, Andersson E, Ljótsson B, et al. Cost-effectiveness of Internet-based cognitive  
36  
37 405 behavior therapy vs. cognitive behavioral group therapy for social anxiety disorder: results  
38  
39 406 from a randomized controlled trial. *Behav Res Ther* 2011;49:729–36.
- 40  
41 407 [32] Kersting, A., Braehler, E., Glaesmer, H., et al. Prevalence of complicated grief in a  
42  
43 408 representative population-based sample. *J Affect Disord.*2011; 339–343.  
44  
45 409  
46 410  
47 411  
48 412  
49 413  
50 414  
51 415  
52 416  
53 417  
54 418  
55 419

420

421

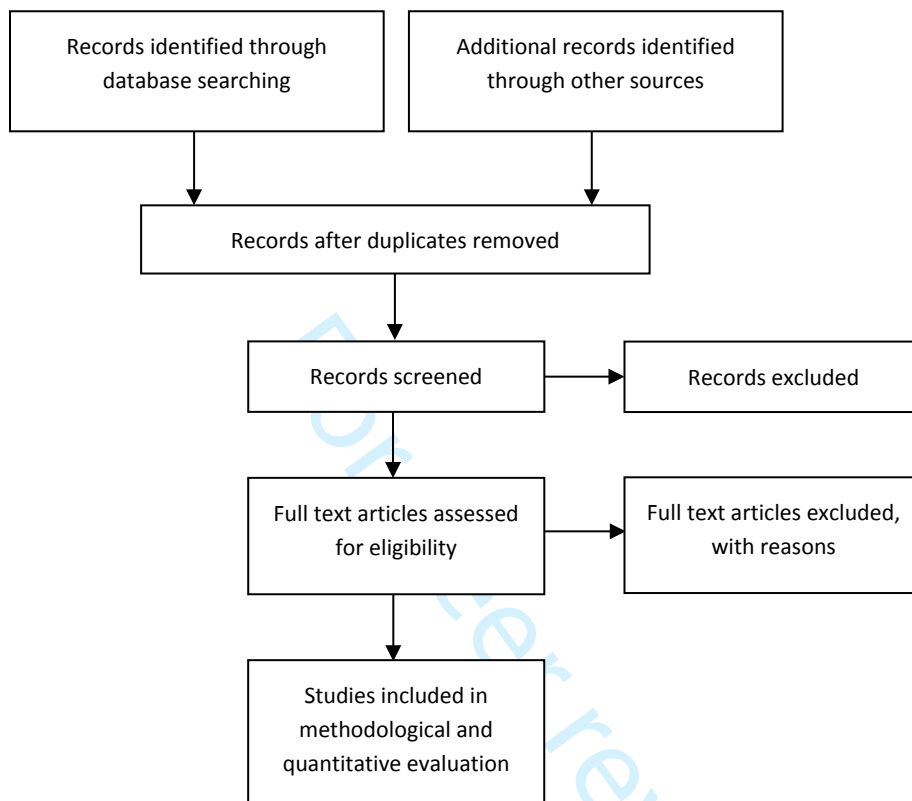

422

423

424 Figure 1. Flow diagram of the planned study selection process adapted from the Preferred  
425 Reporting Items for Systematic Reviews and Meta-Analysis (PRISMA) statement.

426

427

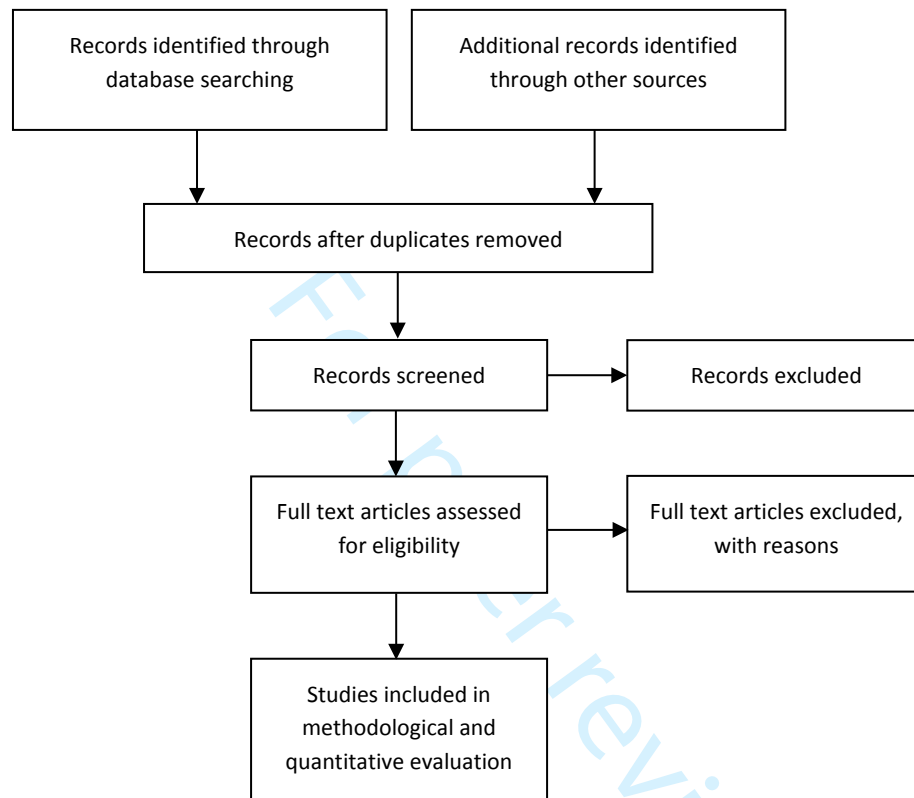

Figure 1. Flow diagram of the planned study selection process adapted from the Preferred Reporting Items for Systematic Reviews and Meta-Analysis (PRISMA) statement.

## PRISMA-P 2015 Checklist

This checklist has been adapted for use with protocol submissions to *Systematic Reviews* from Table 3 in Moher D et al: Preferred reporting items for systematic review and meta-analysis protocols (PRISMA-P) 2015 statement. *Systematic Reviews* 2015 4:1

| Section/topic                     | #  | Checklist item                                                                                                                                                                                  | Information reported     |                          | Line number(s) |
|-----------------------------------|----|-------------------------------------------------------------------------------------------------------------------------------------------------------------------------------------------------|--------------------------|--------------------------|----------------|
|                                   |    |                                                                                                                                                                                                 | Yes                      | No                       |                |
| <b>ADMINISTRATIVE INFORMATION</b> |    |                                                                                                                                                                                                 |                          |                          |                |
| <b>Title</b>                      |    |                                                                                                                                                                                                 |                          |                          |                |
| Identification                    | 1a | Identify the report as a protocol of a systematic review                                                                                                                                        | x                        | <input type="checkbox"/> | 2              |
| Update                            | 1b | If the protocol is for an update of a previous systematic review, identify as such                                                                                                              | <input type="checkbox"/> | <input type="checkbox"/> | n/a            |
| <b>Registration</b>               | 2  | If registered, provide the name of the registry (e.g., PROSPERO) and registration number in the Abstract                                                                                        | x                        | <input type="checkbox"/> | 41             |
| <b>Authors</b>                    |    |                                                                                                                                                                                                 |                          |                          |                |
| Contact                           | 3a | Provide name, institutional affiliation, and e-mail address of all protocol authors; provide physical mailing address of corresponding author                                                   | x                        | <input type="checkbox"/> | 15-22          |
| Contributions                     | 3b | Describe contributions of protocol authors and identify the guarantor of the review                                                                                                             | x                        | <input type="checkbox"/> | 392-396        |
| <b>Amendments</b>                 | 4  | If the protocol represents an amendment of a previously completed or published protocol, identify as such and list changes; otherwise, state plan for documenting important protocol amendments | <input type="checkbox"/> | <input type="checkbox"/> | n/a            |
| <b>Support</b>                    |    |                                                                                                                                                                                                 |                          |                          |                |
| Sources                           | 5a | Indicate sources of financial or other support for the review                                                                                                                                   | x                        | <input type="checkbox"/> | 386-389        |
| Sponsor                           | 5b | Provide name for the review funder and/or sponsor                                                                                                                                               | x                        | <input type="checkbox"/> | 386-389        |
| Role of sponsor/funder            | 5c | Describe roles of funder(s), sponsor(s), and/or institution(s), if any, in developing the protocol                                                                                              | x                        | <input type="checkbox"/> | 386-389        |
| <b>INTRODUCTION</b>               |    |                                                                                                                                                                                                 |                          |                          |                |
| <b>Rationale</b>                  | 6  | Describe the rationale for the review in the context of what is already known                                                                                                                   | x                        | <input type="checkbox"/> | 83-94          |
| <b>Objectives</b>                 | 7  | Provide an explicit statement of the question(s) the review will address with reference to participants, interventions, comparators, and outcomes (PICO)                                        | x                        | <input type="checkbox"/> | 97-103         |
| <b>METHODS</b>                    |    |                                                                                                                                                                                                 |                          |                          |                |

| Section/topic                             | #   | Checklist item                                                                                                                                                                                                                              | Information reported |                          | Line number(s) |
|-------------------------------------------|-----|---------------------------------------------------------------------------------------------------------------------------------------------------------------------------------------------------------------------------------------------|----------------------|--------------------------|----------------|
|                                           |     |                                                                                                                                                                                                                                             | Yes                  | No                       |                |
| <b>Eligibility criteria</b>               | 8   | Specify the study characteristics (e.g., PICO, study design, setting, time frame) and report characteristics (e.g., years considered, language, publication status) to be used as criteria for eligibility for the review                   | x                    | <input type="checkbox"/> | 128-145        |
| <b>Information sources</b>                | 9   | Describe all intended information sources (e.g., electronic databases, contact with study authors, trial registers, or other grey literature sources) with planned dates of coverage                                                        | x                    | <input type="checkbox"/> | 146-203        |
| <b>Search strategy</b>                    | 10  | Present draft of search strategy to be used for at least one electronic database, including planned limits, such that it could be repeated                                                                                                  | x                    | <input type="checkbox"/> | 146-203        |
| <b>STUDY RECORDS</b>                      |     |                                                                                                                                                                                                                                             |                      |                          |                |
| Data management                           | 11a | Describe the mechanism(s) that will be used to manage records and data throughout the review                                                                                                                                                | x                    | <input type="checkbox"/> | 206-212        |
| Selection process                         | 11b | State the process that will be used for selecting studies (e.g., two independent reviewers) through each phase of the review (i.e., screening, eligibility, and inclusion in meta-analysis)                                                 | x                    | <input type="checkbox"/> | 214-221        |
| Data collection process                   | 11c | Describe planned method of extracting data from reports (e.g., piloting forms, done independently, in duplicate), any processes for obtaining and confirming data from investigators                                                        | x                    | <input type="checkbox"/> | 223-245        |
| <b>Data items</b>                         | 12  | List and define all variables for which data will be sought (e.g., PICO items, funding sources), any pre-planned data assumptions and simplifications                                                                                       | x                    | <input type="checkbox"/> | 247-258        |
| <b>Outcomes and prioritization</b>        | 13  | List and define all outcomes for which data will be sought, including prioritization of main and additional outcomes, with rationale                                                                                                        | x                    | <input type="checkbox"/> | 254-258        |
| <b>Risk of bias in individual studies</b> | 14  | Describe anticipated methods for assessing risk of bias of individual studies, including whether this will be done at the outcome or study level, or both; state how this information will be used in data synthesis                        | x                    | <input type="checkbox"/> | 260-286        |
| <b>DATA</b>                               |     |                                                                                                                                                                                                                                             |                      |                          |                |
| <b>Synthesis</b>                          | 15a | Describe criteria under which study data will be quantitatively synthesized                                                                                                                                                                 | x                    | <input type="checkbox"/> | 288-298        |
|                                           | 15b | If data are appropriate for quantitative synthesis, describe planned summary measures, methods of handling data, and methods of combining data from studies, including any planned exploration of consistency (e.g., $I^2$ , Kendall's tau) | x                    | <input type="checkbox"/> | 288-298        |
|                                           | 15c | Describe any proposed additional analyses (e.g., sensitivity or subgroup analyses, meta-regression)                                                                                                                                         | x                    | <input type="checkbox"/> | 294-295        |
|                                           | 15d | If quantitative synthesis is not appropriate, describe the type of summary planned                                                                                                                                                          | x                    | <input type="checkbox"/> | 288-298        |
| <b>Meta-bias(es)</b>                      | 16  | Specify any planned assessment of meta-bias(es) (e.g., publication bias across studies, selective reporting within studies)                                                                                                                 | x                    | <input type="checkbox"/> | 305-328        |
| <b>Confidence in cumulative evidence</b>  | 17  | Describe how the strength of the body of evidence will be assessed (e.g., GRADE)                                                                                                                                                            | x                    | <input type="checkbox"/> | 260-286        |

# BMJ Open

## Effectiveness and feasibility of internet- and mobile-based interventions for individuals experiencing bereavement: A systematic review protocol

|                                 |                                                                                                                                                                                                                                                                                                                                                                                                                                                                                                                                                                                                                                                                                                                                                                                                                          |
|---------------------------------|--------------------------------------------------------------------------------------------------------------------------------------------------------------------------------------------------------------------------------------------------------------------------------------------------------------------------------------------------------------------------------------------------------------------------------------------------------------------------------------------------------------------------------------------------------------------------------------------------------------------------------------------------------------------------------------------------------------------------------------------------------------------------------------------------------------------------|
| Journal:                        | <i>BMJ Open</i>                                                                                                                                                                                                                                                                                                                                                                                                                                                                                                                                                                                                                                                                                                                                                                                                          |
| Manuscript ID                   | bmjopen-2019-036034.R1                                                                                                                                                                                                                                                                                                                                                                                                                                                                                                                                                                                                                                                                                                                                                                                                   |
| Article Type:                   | Protocol                                                                                                                                                                                                                                                                                                                                                                                                                                                                                                                                                                                                                                                                                                                                                                                                                 |
| Date Submitted by the Author:   | 28-Feb-2020                                                                                                                                                                                                                                                                                                                                                                                                                                                                                                                                                                                                                                                                                                                                                                                                              |
| Complete List of Authors:       | Luppa, Melanie; University of Leipzig Faculty of Medicine, Institute of Social Medicine, Occupational Health and Public Health<br>Loebner, Margrit; University of Leipzig Faculty of Medicine, Institute of Social Medicine, Occupational Health and Public Health<br>Pabst, Alexander; University of Leipzig Faculty of Medicine, Institute of Social Medicine, Occupational Health and Public Health<br>Schlapke, Christiane; University of Leipzig Faculty of Medicine, Institute of Social Medicine, Occupational Health and Public Health<br>Stein, Janine; University of Leipzig Faculty of Medicine, Institute of Social Medicine, Occupational Health and Public Health<br>Riedel-Heller, Steffi; University of Leipzig Faculty of Medicine, Institute of Social Medicine, Occupational Health and Public Health |
| <b>Primary Subject Heading</b>: | Mental health                                                                                                                                                                                                                                                                                                                                                                                                                                                                                                                                                                                                                                                                                                                                                                                                            |
| Secondary Subject Heading:      | Public health, Health services research                                                                                                                                                                                                                                                                                                                                                                                                                                                                                                                                                                                                                                                                                                                                                                                  |
| Keywords:                       | MENTAL HEALTH, Depression & mood disorders < PSYCHIATRY, PREVENTIVE MEDICINE                                                                                                                                                                                                                                                                                                                                                                                                                                                                                                                                                                                                                                                                                                                                             |
|                                 |                                                                                                                                                                                                                                                                                                                                                                                                                                                                                                                                                                                                                                                                                                                                                                                                                          |

SCHOLARONE™  
Manuscripts



I, the Submitting Author has the right to grant and does grant on behalf of all authors of the Work (as defined in the below author licence), an exclusive licence and/or a non-exclusive licence for contributions from authors who are: i) UK Crown employees; ii) where BMJ has agreed a CC-BY licence shall apply, and/or iii) in accordance with the terms applicable for US Federal Government officers or employees acting as part of their official duties; on a worldwide, perpetual, irrevocable, royalty-free basis to BMJ Publishing Group Ltd ("BMJ") its licensees and where the relevant Journal is co-owned by BMJ to the co-owners of the Journal, to publish the Work in this journal and any other BMJ products and to exploit all rights, as set out in our [licence](#).

The Submitting Author accepts and understands that any supply made under these terms is made by BMJ to the Submitting Author unless you are acting as an employee on behalf of your employer or a postgraduate student of an affiliated institution which is paying any applicable article publishing charge ("APC") for Open Access articles. Where the Submitting Author wishes to make the Work available on an Open Access basis (and intends to pay the relevant APC), the terms of reuse of such Open Access shall be governed by a Creative Commons licence – details of these licences and which [Creative Commons](#) licence will apply to this Work are set out in our licence referred to above.

Other than as permitted in any relevant BMJ Author's Self Archiving Policies, I confirm this Work has not been accepted for publication elsewhere, is not being considered for publication elsewhere and does not duplicate material already published. I confirm all authors consent to publication of this Work and authorise the granting of this licence.

1  
2  
3 1 **Effectiveness and feasibility of internet- and mobile-based interventions for individuals**  
4  
5 2 **experiencing bereavement: A systematic review protocol**  
6

7 3

8 4

9  
10 5 Luppá, Melanie<sup>1</sup>; Loebner, Margrit<sup>1</sup>; Pabst, Alexander<sup>1</sup>; Schlapke, Christiane<sup>1</sup>, Stein, Janine<sup>1</sup>;

11  
12 6 Riedel-Heller, Steffi G. <sup>1</sup>  
13

14 7

15  
16 8 <sup>1</sup> Institute of Social Medicine, Occupational Health and Public Health, Faculty of Medicine,  
17 9 University of Leipzig  
18

19 10

20 11

21 12

22 13

23 14

24 15

25 16

26 17

27 18

28 19

29 20

30 21

31 22

32 23

33 24

34 25

35 26

36 27

37 28

38 29

39 30

40 31

41 32

42 33

43 34

44 35

45 36

35 17 Corresponding author:

36 18 Melanie Luppá, PhD

37 19 Institute of Social Medicine, Occupational Health and Public Health, Faculty of Medicine,  
38 20 University of Leipzig

39 21 Philipp-Rosenthal-Straße 55

40 22 04103 Leipzig

41 23 Germany

42 24 Email: [Melanie.Luppá@medizin.uni-leipzig.de](mailto:Melanie.Luppá@medizin.uni-leipzig.de)

43 25 Phone: +49 341 9715406

44 26 Word count: 3,678  
45  
46  
47  
48  
49  
50  
51  
52  
53  
54  
55  
56  
57  
58  
59  
60



## 27 ABSTRACT

28 Introduction: Internet- and mobile-based interventions (IMIs) provide an innovative and  
29 efficient self-management tool for mental health problems. This systematic review aims to  
30 summarise and critically evaluate studies addressing the effectiveness and feasibility of IMIs  
31 for normal and complicated grief in bereaved adults.

32 Methods and Analysis: The databases MEDLINE, Cochrane Library, PsycINFO, EMBASE and  
33 Web of Science and Google Scholar (for “grey” literature) will be systematically searched for  
34 feasibility studies or randomized controlled trials of IMIs for bereaved adults who were  
35 experiencing normal/complicated grief. Data will be extracted and evaluated independently  
36 by two reviewers from studies eligible for inclusion. Quality of evidence will be assessed, and  
37 results will be synthesized qualitatively and pooled meta-analytically, if sufficient outcome  
38 data are available. PRISMA standards and GRADE methodology will be used.

39 Ethics and Dissemination: No primary data will be collected; thus, ethical approval is not  
40 required. The results will be disseminated through a peer-reviewed publication and  
41 conference presentations.

42 PROSPERO registration number: CRD42019131428

43 Keywords: grief, bereavement, systematic review, internet- and mobile-based, effectiveness,  
44 feasibility

## 46 Strengths and limitations of this study

- 47 - first study which provides a comprehensive summary of studies investigating  
48 effectiveness and feasibility of internet- and mobile-based interventions (IMIs) for  
49 normal and complicated grief in bereaved adults
- 50 - possibility of usage of these IMIs in healthcare as additional intervention tools as well  
51 as low-threshold treatment options
- 52 - application with the necessary caution of these IMIs seems to be required not to  
53 interfere with natural grief processes

## 58 Background

59  
60 Self-management is a widely used approach within the medical health care system for  
61 improving patients' knowledge, capabilities and skills in managing their health problems.  
62 Internet- and mobile-based interventions (IMIs) provide an innovative and efficient self-  
63 management tool for mental health problems. In recent years, web-based self-management  
64 interventions have gained increasing attention as effective supplementary treatment  
65 elements to standard mental health treatment[1].

66 The effectiveness of IMIs has been shown for treating depression (e.g.[2-4]), anxiety  
67 (e.g.[5,6]), post-traumatic stress disorder (PTSD; e.g.[7-9]), and other mental health  
68 problems[1]. However, less is currently known about IMIs for individuals experiencing  
69 normal or complicated grief.

70 In general, grief is defined as a typical reaction to the loss of a significant other[10] , and is  
71 associated with symptoms such as intense subjective distress, loneliness, and somatic  
72 symptoms, e.g. tightness of the throat or need for sighing[11,12]. Recently, the concept of  
73 an abnormal reaction to loss has been proposed and is included as a disorder in the  
74 *Diagnostic Statistical Manual of Mental Disorders*, 5<sup>th</sup> Edition (*DSM-V*) and is expected to be  
75 included in the *International Statistical Classification of Diseases and Related Health*  
76 *Problems*, 11<sup>th</sup> Revision (*ICD-11*) as a new diagnosis. The disorders Complicated, Traumatic,  
77 or Prolonged Grief (subsequently summarized under complicated grief) and Complicated  
78 Grief are described as "a syndrome of prolonged and intense grief that is accompanied by  
79 complications that derail the progress of grief"[13]. In contrast to uncomplicated grief,  
80 clinically significant impairment in social, occupational, or other important areas of  
81 functioning must be present[13,14]. The diagnosis of complicated grief is given only after a  
82 period of six months following the index loss event if the person is still suffering from  
83 separation stress as well as cognitive, emotional, and behavioral symptoms[14].

84 Because grief can affect many areas of life[15,16] and is one of the major contributors to the  
85 development of mental health disorders, providing IMIs as a low-threshold treatment option  
86 may enable more people to receive treatment than through face-to-face interventions  
87 alone[17] to prevent the development of mental health disorders. Major Depression,  
88 Generalized Anxiety Disorder, and Post-Traumatic Stress Disorder are particularly closely  
89 related to the symptoms of complicated grief, but differences between the disorders have  
90 also been reported[14,18].

1  
2  
3 91 To date, a number of IMIs for bereavement problems exist in the international research  
4  
5 92 literature. Internet-based Cognitive Behavioral Therapy (CBT) interventions were reported to  
6  
7 93 be effective in treating patients with complicated grief[19] but not for those with  
8  
9 94 uncomplicated grief[20]. Some researchers have urged caution in implementing  
10  
11 95 interventions too early or across a wide range of bereavement-related distress so as to not  
12  
13 96 interfere with natural grief processes[21,22]. One study showed that IMIs for PTSD improve  
14  
15 97 symptoms of complicated grief[23]. To our knowledge, there are no previous systematic  
16  
17 98 reviews summarizing the effectiveness and feasibility of IMIs for bereaved individuals – for  
18  
19 99 normal as well as complicated grief. The results of this review and meta-analysis will  
20  
21 100 therefore address this gap in the literature. This protocol describes the rationale and design  
22  
23 101 of the planned systematic review and meta-analysis.  
24

102

## 103 OBJECTIVES

104 The planned review aims to systematically evaluate and synthesize the evidence base of  
105 randomized controlled-trials (RCT)s reporting, the effectiveness of IMIs (i.e. improvement of  
106 objective parameters), and the feasibility of IMIs (e.g. usability, satisfaction, acceptability,  
107 understandability and usefulness) for individuals aged 18 years and older who experienced  
108 the death of a significant other. Depending on the number of eligible studies, assessment  
109 tools, and quality of the studies reported, we will also combine data across RCTs to estimate  
110 pooled effect sizes for the considered outcomes.  
111

112

113

## 114 METHODS AND ANALYSIS

115 This protocol outlines the strategies for conducting a systematic review and meta-analysis of  
116 RCTs which examined the effectiveness of IMIs for bereavement. It is based on the Preferred  
117 Reporting Items for Systematic Reviews and Meta-Analysis (PRISMA) for systematic review  
118 protocols (PRISMA-P) guidelines[24,25]. The protocol describes the planned strategy to  
119 systematically evaluate and synthesize data from randomized controlled trials and feasibility  
120 studies on IMIs for bereaved individuals. We will apply the four-phase PRISMA flow diagram  
(figure 1) for our study selection process.  
121

122

123

124 Eligibility criteria

1  
2  
3 125 The systematic review will be divided into two parts: effectiveness studies and feasibility  
4  
5 126 studies on IMIs (study design criteria) which include adults (18 years and older), who  
6  
7 127 experienced the death of a significant other and were suffering from normal or complicated  
8  
9 128 grief (participant criteria). Any measures of effectiveness (i.e. improvement of objective  
10  
11 129 parameters) and feasibility (e.g. usability, satisfaction, acceptability, understandability and  
12  
13 130 usefulness) (outcome criteria) of IMIs related to bereavement will be included. Onset data  
14  
15 131 from clinician-rated scales will be prioritized over self-report questionnaires. The  
16  
17 132 intervention must have been a psychological intervention according to Kampling et al.[26]  
18  
19 133 criteria: cognitive behavioral therapy (CBT), psychodynamic psychotherapy, behavior  
20  
21 134 therapy or behavior modification, systemic therapy, third wave cognitive behavioral therapy,  
22  
23 135 humanistic therapy, integrative therapy or to other psychological-orientated interventions  
24  
25 136 and must have been provided in an online setting (intervention criteria). In RCTs, the  
26  
27 137 comparison group must be either 'treatment as usual', 'waiting list', 'attention placebo'  
28  
29 138 (inactivity on the part of both researchers and participants), or 'psychological placebo'  
30  
31 139 (activity on the part of participants and inactivity of researchers). We will consider articles  
32  
33 140 that are written in either English or German (language criteria). The literature search will not  
34  
35 141 be restricted by publication date.

#### 35 142 Information sources and search strategy

36  
37 143 Systematic literature searches will be conducted in the databases MEDLINE (PubMed  
38  
39 144 interface), Cochrane Library (Cochrane Database of Systematic Reviews, Cochrane Central  
40  
41 145 Register of Controlled Trials (CENTRAL), Cochrane Methodology Register), PsycINFO,  
42  
43 146 EMBASE, Web of Science (Science and Social Science Citation Index) and Google Scholar (for  
44  
45 147 "grey" literature) by ML and CS independently. A combination of the following search terms  
46  
47 148 will be used: (1) bereavement or widowhood or grief; and (2) online or web or computer or  
48  
49 149 mobile or e-health or internet; and (3) intervention or psychotherapy or cognitive  
50  
51 150 behavioural therapy or CBT. The draft of the full MEDLINE search strategy is available in  
52  
53 151 online supplementary appendix 1. If feasible, medical subject headings (MeSH) will be used  
54  
55 152 as search terms. The finalized MEDLINE search strategy will be adapted to the syntax and  
56  
57 153 subject headings specifications of the other databases. We will initially screen titles and  
58  
59 154 abstracts for eligibility. Full texts will then be assessed for criteria, and the reference lists of  
60  
155 included articles and systematic reviews will be hand searched to identify further potentially  
156 relevant studies. Finally, we will conduct a grey literature search for unpublished studies

1  
2  
3 157 using Google and Google Scholar with the above-named search terms. If applicable and  
4  
5 158 necessary, we will contact researchers directly to gather further relevant non-published  
6  
7 159 data. The searches will be re-run just before the final analyses so that more recent studies  
8  
9 160 can be retrieved.

10  
11 161  
12 162 Data management  
13  
14 163 References and data will be managed using the Review Manager (RevMan) software package  
15  
16 164 version 5.3 (by the Nordic Cochrane Centre, The Cochrane Collaboration, Copenhagen,  
17  
18 165 Denmark, 2014). RevMan is specifically designed for managing and analyzing systematic  
19  
20 166 review data from bibliographical management to data synthesis. If feasible, additional data  
21  
22 167 analyses and meta-analysis will be conducted using Stata 13.1 SE (StataCorp LP, College  
23  
24 168 Station, Texas, USA).

25 169  
26  
27 170 Selection process  
28  
29 171 All titles and abstracts of articles will be screened independently by two reviewers (ML, CS).  
30  
31 172 At this stage, articles will be divided into potentially relevant, irrelevant or uncertain.  
32  
33 173 Reasons for exclusion of irrelevant articles will be given. Potentially relevant and uncertain  
34  
35 174 articles will be read in full text independently by ML and CS, and study eligibility based on  
36  
37 175 the established criteria specified above will be assessed. At each stage of the selection  
38  
39 176 process, any discrepancies will be discussed between the two reviewers. When discrepancies  
40  
41 177 cannot be resolved, input from a third senior researcher (SRH) will be obtained.

42 178  
43 179 Data collection process and data items  
44  
45 180 A standardized data extraction form will be used to extract data from included studies.  
46  
47 181 Extracted data will include study characteristics, participant characteristics, methodological  
48  
49 182 factors and outcome data. A pilot version of the data extraction form will be tested  
50  
51 183 independently by the two reviewers (ML, CS) on a subsample of relevant studies to ensure  
52  
53 184 correct extraction of all relevant data. Difficulties with data extraction will be discussed and  
54  
55 185 the form will be adopted accordingly. Data from each study will be extracted by both  
56  
57 186 reviewers (ML, CS) independently, and reliability of data extraction will be checked in a  
58  
59 187 random sample of studies. Discrepancies between the two reviewers will be discussed with a  
60  
188 senior researcher (SRH). Missing data will be requested from study authors.

189

The following data will be extracted:

(1) Study identification items: e.g. first author, year of publication, country

(2) Study design characteristics: e.g. sample size, recruitment strategy, inclusion/exclusion criteria, circumstances of the loss (e.g. violent death, suicide), control group, diagnostic criteria/assessment of normal/prolonged/complicated grief, assessment of co-occurring conditions (e. g. Major Depression, Posttraumatic stress disorder, concurrent pharmaco-/psychotherapy), assessment of suicidal ideation or behaviour, interventions design/type, duration of intervention, length of follow-up assessments

(3) Participants characteristics: e.g. mean age, age range, gender

(4) Methodological aspects: risk of bias, study limitations

(5) Outcomes: (a) Effectiveness: Primary outcome measures: reduction of grief symptoms; Secondary outcome measures: reduction of depression, anxiety, somatization or PTS symptoms or suicidal ideation or behaviour) and (b) feasibility: usability, satisfaction, acceptability, understandability and usefulness;; onset data from clinician-rated scales will be prioritized over self-report questionnaires. All different time frames of follow-up assessments will be included.

207

#### Quality assessment

The methodological quality of included studies will be assessed by two researchers (ML, CS) independently using the Cochrane Collaboration Tool for Assessing Risk of Bias in RCTs[27].

As recommended, each study will be assessed in the following domains: (1) selection bias, i.e. descriptions of the (1a) method of randomisation and (1b) concealment of allocation; (2) performance bias, i.e. description of the methods of blinding participants and researchers; (3) detection bias, i.e. description of the methods of blinding outcome assessment; (4) attrition bias, i.e. description of incomplete outcome data; (5) reporting bias, i.e. description of selective outcome reporting; and (6) other bias, i.e. description of important concerns about other biases. Studies will be rated as 'high', 'low', or 'unclear'. These assessments will be used to inform the corresponding GRADE assessment of study limitations (see table 5.6 of the Grades of Recommendation, Assessment, Development and Evaluation (GRADE) handbook[28]). Specifically, 'low risk of bias' would indicate 'no limitation'; 'unclear risk of

1  
2  
3 221 bias' would indicate either 'no limitation' or 'serious limitation'; and 'high risk of bias' would  
4  
5 222 indicate either 'serious limitation' or 'very serious limitation' in the GRADE approach. Any  
6  
7 223 disagreement between the two reviewers will be resolved by discussions with involvement  
8  
9 224 of a third review author where necessary. Study authors will be contacted for further  
10  
11 225 methodological information if needed. In the risk of bias table, results of the judgements will  
12  
13 226 be shown for each domain.  
14

15 227

## 16 228 Data synthesis and presentation

17  
18 229 A narrative synthesis for all included studies and relevant characteristics listed under 'data  
19  
20 230 collection process' will be provided in text and 'summary of findings' tables. Characteristics  
21  
22 231 of the study, sample, intervention and control condition will be presented first, followed by  
23  
24 232 outcome measurements, effect sizes, and overall results.

25  
26 233 Only studies that provide a quantitative measure of grief symptoms will be included in the meta-  
27  
28 234 analysis. We will analyze heterogeneity by providing  $I^2$  statistics and funnel and forest plots.  
29  
30 235 According to the Cochrane standards, we suppose a moderate level of heterogeneity  
31  
32 236 between studies for  $I^2$  values ranging from 30% to 60%[29]. If studies fail to show sufficient  
33  
34 237 heterogeneity ( $I^2 < 60\%$ ) in at least two trials[30], meta-analytic pooling will not be undertaken.  
35  
36 238 However, inconsistency may occur from differences in study characteristics[29]. Therefore, we will  
37  
38 239 explore sources of heterogeneity in subgroups of studies in terms of type of grief or  
39  
40 240 intervention type. A random effects model will be applied. We will estimate standardized mean  
41  
42 241 difference values and the respective 95% confidence intervals. We will follow the Cochrane  
43  
44 242 Handbook for Systematic Reviews of Interventions[27] to deal with missing data.

45  
46 243 Data analyses will be performed using Review Manager 5.3 software from the Cochrane  
47  
48 244 Collaboration Tool for Implementing the Characteristics of Studies (Review Manager  
49  
50 245 (RevMan) [Computer program], 2014).

51 246

52 247

## 53 248 Patient and Public Involvement

54  
55 249 No patient involved. Discussion

56  
57 250 The planned systematic review will provide a comprehensive summary of the effectiveness  
58  
59 251 and feasibility of internet- and mobile-based interventions for adults who suffer from  
60  
252 bereavement.



1  
2  
3 253 If treatment programs for bereavement which utilize either the Internet or mobile phone  
4  
5 254 technology show effectiveness and feasibility, this therapeutic delivery method has the  
6  
7 255 potential to become an additional intervention tool. Internet-based interventions can reach  
8  
9 256 more people than face-to-face interventions[17] . Their cost-effectiveness for depression[31]  
10  
11 257 and anxiety disorders[32,33] have also been demonstrated. Because of a prevalence rate of  
12  
13 258 3.7% for complicated grief in Germany[34], a low-threshold treatment option would enable  
14  
15 259 the provision of adequate care to more bereaved adults.

16 260 If there are an insufficient number of studies that have examined gender and age  
17  
18 261 differences, this will be discussed in terms of a need for future research. Second, this review  
19  
20 262 could motivate other researchers to construct and test in randomized trials new or modified  
21  
22 263 internet- or mobile-based interventions for bereaved adults.

23 264

24 265

25 266

26 267 Amendments

27 268 In the event of protocol amendments, we will provide the date, a description of and  
28  
29 269 rationale for of each amendment.

30 270

31 271 Abbreviations

32 272 CBT – cognitive behavioural therapy

33 273 CENTRAL - Cochrane Central Register of Controlled Trials

34 274 GRADE - Grades of Recommendation, Assessment, Development and Evaluation

35 275 IMI - Internet- and mobile-based interventions

36 276 PRISMA - Preferred Reporting Items for Systematic Reviews and Meta-Analysis

37 277 PTSD - post-traumatic stress disorder

38 278 RCT - randomized controlled-trials

39 279

40 280 Declarations section

41 281 Ethics Approval and Consent to Participate

42 282 Ethical approval and consent to participate are not required as no primary data will be  
43  
44 283 collected. The results of this systematic review are intended to be published in an  
45  
46 284 international peer-reviewed journal. Results may also be presented at relevant professional  
47  
48 285 conferences and meetings.



1  
2  
3 286  
4

5 287 Availability of supporting data

6  
7 288 Not applicable

8  
9 289

10 290 Competing interest

11  
12 291 None declared

13  
14 292

15  
16 293 Funding

17  
18 294 This publication is part of the AgE-health-study and was funded by the German Federal

19  
20 295 Ministry of Education and Research (reference number: 01GY1613). The funding source had

21  
22 296 no role in the design of the study and will not have any role in its execution, analyses,

23  
24 297 interpretation of the data, or decision to submit results

25  
26 298

27  
28 299 Author Contributions

29  
30 300 ML, CS, AP, MLö, JS, SRH contributed substantially to the conception of the work; ML and CS

31  
32 301 drafted the manuscript; AP, MLö, JS, SRH revised the manuscript critically for important

33  
34 302 intellectual content; ML, CS, AP, MLö, JS, SRH finally approved the version to be published.

35  
36 303 ML, CS, AP, MLö, JS, SRh gave agreement to be accountable for all aspects of the work.

37  
38 304

39 305 Acknowledgement

40  
41 306 Not applicable

42  
43 307

44 308 Author's information

45  
46 309 All authors approved the final version of the manuscript.

47  
48 310

49  
50 311 Figure legend

51  
52 312 Figure 1. Flow diagram of the planned study selection process adapted from the Preferred

53  
54 313 Reporting Items for Systematic Review and Meta-Analysis (PRISMA) statement

55  
56 314

57  
58 315

59  
60 316

317

318

## 319 References

- 320 [1] Stein J, Röhr S, Luck T, et al. Indikationen und Evidenz von international entwickelten  
321 Online-Coaches zur Intervention bei psychischen Erkrankungen – ein Meta-Review. *Psychiat*  
322 *Prax* 2018;45:7–15.
- 323 [2] Richards D, Duffy D, Burke J, et al. Supported Internet-Delivered Cognitive Behavior  
324 Treatment for Adults with Severe Depressive Symptoms: A Secondary Analysis. *JMIR Ment*  
325 *Health* 2018;5:e10204.
- 326 [3] Twomey C, O'Reilly G, Meyer B. Effectiveness of an individually-tailored computerised  
327 CBT programme (Deprexis) for depression: A meta-analysis. *Psychiat res* 2017;256:371–7.
- 328 [4] Karyotaki E, Ebert DD, Donkin L, et al. Do guided internet-based interventions result in  
329 clinically relevant changes for patients with depression? An individual participant data meta-  
330 analysis. *Clin Psychol Rev* 2018;63:80–92.
- 331 [5] Morgan C, Mason E, Newby JM, et al. The effectiveness of unguided internet cognitive  
332 behavioural therapy for mixed anxiety and depression. *Internet Interv* 2017;10: 47–53.
- 333 [6] Morris J, Firkins A, Millings A, et al. Internet-delivered cognitive behavior therapy for  
334 anxiety and insomnia in a higher education context. *Anxiety, stress, and coping*  
335 2016;29:415–31.
- 336 [7] Lange A, van de Ven J, Schrieken B. Interapy: treatment of post-traumatic stress via the  
337 internet. *Cogn Behav Ther* 2003;32:110–24.
- 338 [8] Sijbrandij M, Kunovski I, Cuijpers P. Effectiveness of internet-delivered cognitive  
339 behavioral therapy for posttraumatic stress disorder: A systematic review and meta-analysis.  
340 *Dep Anx* 2016;33:783–91.
- 341 [9] Spence J, Titov N, Dear BF, et al. Randomized controlled trial of Internet-delivered  
342 cognitive behavioral therapy for posttraumatic stress disorder. *Dep Anx* 2011;28:541–50.
- 343 [10] Lammer K. Trauer verstehen. Formen, Erklärungen, Hilfen. 4. Aufl. Berlin: Springer 2014.  
344 Online verfügbar unter <http://dx.doi.org/10.1007/978-3-642-41667-5>.
- 345 [11] Jackson EN. Understanding grief. *Pastoral Psychol* 1957;8:41–8.
- 346 [12] Lindemann E. Symptomatology and management of acute grief. *Am J Psychiat*  
347 1944;101:141–8.
- 348 [13] Zisook S, Simon NM, Reynolds CF, et al. Bereavement, complicated grief, and DSM, part  
349 2: complicated grief. *J Clin Psychiat* 2010;71:1097–8.

- 1  
2  
3 350 [14] Prigerson HG, Horowitz MJ, Jacobs SC, et al. Prolonged grief disorder: Psychometric  
4 351 validation of criteria proposed for DSM-V and ICD-11. *PLoS Med* 2009;6:e1000121.
- 6 352 [15] Hutti MH, Armstrong DS, Myers JA, et al. Grief intensity, psychological well-being, and  
8 353 the intimate partner relationship in the subsequent pregnancy after a perinatal loss. *JOGNN*  
10 354 2015;44:42–50.
- 12 355 [16] O'Connor M, Nickerson A, Aderka IM, et al. The temporal relationship between change  
14 356 in symptoms of prolonged grief and posttraumatic stress following old age spousal  
16 357 bereavement. *Dep Anx* 2015;32:335–40.
- 18 358 [17] Muñoz RF. Using evidence-based internet interventions to reduce health disparities  
19 359 worldwide. *J Med Internet Res* 2010;12:e60.
- 21 360 [18] Boelen PA, van de Schoot R, van den Hout MA, et al. Prolonged grief disorder,  
23 361 depression, and posttraumatic stress disorder are distinguishable syndromes. *J Affect Dis*  
25 362 2010;125: 374-8.
- 27 363 [19] Wagner B, Knaevelsrud C, Maercker A. Internet-based cognitive-behavioral therapy for  
28 364 complicated grief: a randomized controlled trial. *Death studies* 2006;30:429–453.
- 30 365 [20] van der Houwen K, Schut H, van den Bout J, et al. The efficacy  
32 366 of a brief internet-based self-help intervention for the bereaved. *Behav Res*  
34 367 *Ther* 2010;48:359-67.
- 36 368 [21] Kleinman A. Culture, bereavement, and psychiatry. *Lancet* 2012;379:608–9.
- 38 369 [22] Schut H, Stroebe MS, Van den Bout J, et al. The efficacy of bereavement interventions:  
39 370 Determining who benefits. In: Stroebe MS, Hansson RO, Stroebe W, Schut H  
41 371 (Eds.), *Handbook of bereavement research: Consequences, coping, and care* Washington,  
43 372 DC, US: American Psychological Association 2001:705-37.
- 45 373 [23] Kersting A, Dölemeyer R, Steinig J, et al. Brief Internet-based intervention reduces  
47 374 posttraumatic stress and prolonged grief in parents after the loss of a child during  
49 375 pregnancy: a randomized controlled trial. *Psychother Psychosom* 2013;82:372-81.
- 51 376 [24] Moher D, Liberati A, Tetzlaff J. Preferred reporting items for systematic reviews and  
52 377 meta-analysis: the PRISMA statement. *BMJ* 2009;339:b2535.
- 54 378 [25] Shamseer L, Moher D, Clarke M, et al. Preferred reporting items for systematic review  
56 379 and meta-analysis protocols (PRISMA-P): elaboration and explanation. *BMJ (Clin Res ed.)*  
58 380 2015;350:g7647.

- 1  
2  
3 381 [26] Kampling H, Baumeister H, Jaeckel WH, et al. Prevention of depression in chronically  
4 382 physically ill adults. Cochrane Systematic Review - Intervention – Protocol.  
5  
6 383 <https://doi.org/10.1002/14651858.CD011246>  
7  
8 384 [27] Higgins JPT, Altman DG, Gøtzsche PC, et al. The Cochrane Collaboration's tool for  
9 385 assessing risk of bias in randomised trials. *BMJ (Clin Res ed.)* 2011;343: d5928.  
10  
11 386 [28] Guyatt GH, Oxman AD D, Vist GE, et al. GRADE: an emerging consensus on rating quality  
12 387 of evidence and strength of recommendations. *BMJ (Clin Res ed.)* 2008;336:924–6.  
13  
14 388 [29] Schünemann H, Brożek J, Guyatt G, et al. GRADEpro GDT. 2013. GRADE Handbook  
15 389 <https://gdt.gradepro.org/app/handbook/handbook.html#h.svwngs6pm0f2>.  
16  
17 390 [30] Valentine JC, Pigott TD, Rothstein HR. How many studies do you need? A primer on  
18 391 statistical power for meta-analysis. *J Educ Behav Stat.* 2010;35:215–47.  
19  
20 392 [31] Gerhards SAH, de Graaf LE, Jacobs LE, et al. Economic evaluation of online computerised  
21 393 cognitive behavioural therapy without support for depression in primary care: a randomised  
22 394 trial. *British J Psych* 2010;196:310–318.  
23  
24 395 [32] Hedman E, Andersson E, Lindefors N, et al. Cost-effectiveness and long-term  
25 396 effectiveness of internet-based cognitive behaviour therapy for severe health anxiety.  
26 397 *Psychol Med* 2013;43:363–74.  
27  
28 398 [33] Hedman E, Andersson E, Ljótsson B, et al. Cost-effectiveness of Internet-based cognitive  
29 399 behavior therapy vs. cognitive behavioral group therapy for social anxiety disorder: results  
30 400 from a randomized controlled trial. *Behav Res Ther* 2011;49:729–36.  
31  
32 401 [34] Kersting, A, Brahler, E, Glaesmer, H, et al. Prevalence of complicated grief in a  
33 402 representative population-based sample. *J Affect Disord* 2011;131:339–43.  
34  
35  
36  
37  
38  
39  
40  
41  
42  
43  
44  
45  
46  
47  
48  
49  
50  
51  
52  
53  
54  
55  
56  
57  
58  
59  
60

1  
2  
3  
4  
5  
6  
7  
8  
9  
10  
11  
12  
13  
14  
15  
16  
17  
18  
19  
20  
21  
22  
23  
24  
25  
26  
27  
28  
29  
30  
31  
32  
33  
34  
35  
36  
37  
38  
39  
40  
41  
42  
43  
44  
45  
46  
47  
48  
49  
50  
51  
52  
53  
54  
55  
56  
57  
58  
59  
60

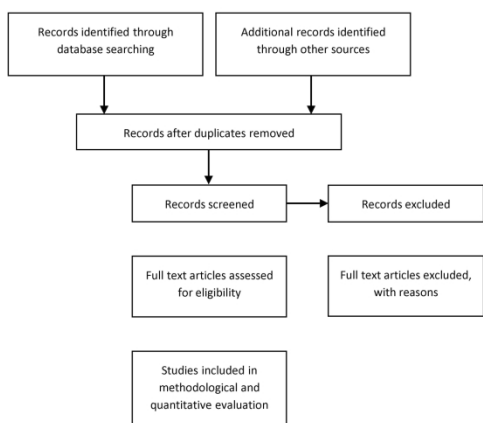

Figure 1. Flow diagram of the planned study selection process adapted from the Preferred Reporting Items for Systematic Review and Meta-Analysis (PRISMA) statement

254x190mm (300 x 300 DPI)

1  
2  
3  
4  
5  
6  
7  
8  
9  
10  
11  
12  
13  
14  
15  
16  
17  
18  
19  
20  
21  
22  
23  
24  
25  
26  
27  
28  
29  
30  
31  
32  
33  
34  
35  
36  
37  
38  
39  
40  
41  
42  
43  
44  
45  
46  
47  
48  
49  
50  
51  
52  
53  
54  
55  
56  
57  
58  
59  
60

PubMed.gov  
US National Library of Medicine National Institutes of Health

PubMed  Search [Advanced](#) [Help](#)

**Search Details**

**Query Translation:**

```
((("bereavement"[MeSH Terms] OR "bereavement"[All Fields]) OR ("widowhood"[MeSH Terms] OR "widowhood"[All Fields]) OR ("grief"[MeSH Terms] OR "grief"[All Fields])) AND (online[All Fields] OR web[All Fields] OR ("computers"[MeSH Terms] OR "computers"[All Fields] OR "computer"[All Fields]) OR mobile[All Fields] OR e-health[All Fields] OR ("internet"[MeSH Terms] OR "internet"[All Fields])) AND (("methods"[MeSH Terms] OR "methods"[All Fields] OR "intervention"[All Fields]) OR ("psychotherapy"[MeSH Terms] OR "psychotherapy"[All Fields]) OR ("cognitive behavioral therapy"[MeSH Terms] OR "cognitive behavioral therapy"[All Fields]) AND "behavioral"[All Fields]))
```

Search

**Result:**  
273

**Translations:**

|               |                                                                                                                                 |
|---------------|---------------------------------------------------------------------------------------------------------------------------------|
| bereavement   | "bereavement"[MeSH Terms] OR "bereavement"[All Fields]                                                                          |
| widowhood     | "widowhood"[MeSH Terms] OR "widowhood"[All Fields]                                                                              |
| grief         | "grief"[MeSH Terms] OR "grief"[All Fields]                                                                                      |
| computer      | "computers"[MeSH Terms] OR "computers"[All Fields] OR "computer"[All Fields]                                                    |
| internet      | "internet"[MeSH Terms] OR "internet"[All Fields]                                                                                |
| intervention  | "methods"[MeSH Terms] OR "methods"[All Fields] OR "intervention"[All Fields]                                                    |
| psychotherapy | "psychotherapy"[MeSH Terms] OR "psychotherapy"[All Fields]                                                                      |
| cognitive     | "cognitive behavioral therapy"[MeSH Terms] OR ("cognitive"[All Fields] AND "behavioral"[All Fields] AND "therapy"[All Fields])  |
| behavioural   | "cognitive behavioral therapy"[All Fields] OR ("cognitive"[All Fields] AND "behavioural"[All Fields] AND "therapy"[All Fields]) |
| therapy       | "cognitive behavioural therapy"[All Fields]                                                                                     |

**Database:**  
PubMed

**User query:**  
(bereavement OR widowhood OR grief) AND (online OR web OR computer OR mobile OR e-health OR internet) AND (intervention OR psychotherapy OR cognitive behavioural therapy OR CBT)

## PRISMA-P 2015 Checklist

This checklist has been adapted for use with protocol submissions to *Systematic Reviews* from Table 3 in Moher D et al: Preferred reporting items for systematic review and meta-analysis protocols (PRISMA-P) 2015 statement. *Systematic Reviews* 2015 4:1

| Section/topic                     | #  | Checklist item                                                                                                                                                                                  | Information reported     |                          | Line number(s) |
|-----------------------------------|----|-------------------------------------------------------------------------------------------------------------------------------------------------------------------------------------------------|--------------------------|--------------------------|----------------|
|                                   |    |                                                                                                                                                                                                 | Yes                      | No                       |                |
| <b>ADMINISTRATIVE INFORMATION</b> |    |                                                                                                                                                                                                 |                          |                          |                |
| <b>Title</b>                      |    |                                                                                                                                                                                                 |                          |                          |                |
| Identification                    | 1a | Identify the report as a protocol of a systematic review                                                                                                                                        | x                        | <input type="checkbox"/> | 2              |
| Update                            | 1b | If the protocol is for an update of a previous systematic review, identify as such                                                                                                              | <input type="checkbox"/> | <input type="checkbox"/> | n/a            |
| <b>Registration</b>               | 2  | If registered, provide the name of the registry (e.g., PROSPERO) and registration number in the Abstract                                                                                        | x                        | <input type="checkbox"/> | 41             |
| <b>Authors</b>                    |    |                                                                                                                                                                                                 |                          |                          |                |
| Contact                           | 3a | Provide name, institutional affiliation, and e-mail address of all protocol authors; provide physical mailing address of corresponding author                                                   | x                        | <input type="checkbox"/> | 15-22          |
| Contributions                     | 3b | Describe contributions of protocol authors and identify the guarantor of the review                                                                                                             | x                        | <input type="checkbox"/> | 392-396        |
| <b>Amendments</b>                 | 4  | If the protocol represents an amendment of a previously completed or published protocol, identify as such and list changes; otherwise, state plan for documenting important protocol amendments | <input type="checkbox"/> | <input type="checkbox"/> | n/a            |
| <b>Support</b>                    |    |                                                                                                                                                                                                 |                          |                          |                |
| Sources                           | 5a | Indicate sources of financial or other support for the review                                                                                                                                   | x                        | <input type="checkbox"/> | 386-389        |
| Sponsor                           | 5b | Provide name for the review funder and/or sponsor                                                                                                                                               | x                        | <input type="checkbox"/> | 386-389        |
| Role of sponsor/funder            | 5c | Describe roles of funder(s), sponsor(s), and/or institution(s), if any, in developing the protocol                                                                                              | x                        | <input type="checkbox"/> | 386-389        |
| <b>INTRODUCTION</b>               |    |                                                                                                                                                                                                 |                          |                          |                |
| <b>Rationale</b>                  | 6  | Describe the rationale for the review in the context of what is already known                                                                                                                   | x                        | <input type="checkbox"/> | 83-94          |
| <b>Objectives</b>                 | 7  | Provide an explicit statement of the question(s) the review will address with reference to participants, interventions, comparators, and outcomes (PICO)                                        | x                        | <input type="checkbox"/> | 97-103         |
| <b>METHODS</b>                    |    |                                                                                                                                                                                                 |                          |                          |                |

| Section/topic                             | #   | Checklist item                                                                                                                                                                                                                              | Information reported |                          | Line number(s) |
|-------------------------------------------|-----|---------------------------------------------------------------------------------------------------------------------------------------------------------------------------------------------------------------------------------------------|----------------------|--------------------------|----------------|
|                                           |     |                                                                                                                                                                                                                                             | Yes                  | No                       |                |
| <b>Eligibility criteria</b>               | 8   | Specify the study characteristics (e.g., PICO, study design, setting, time frame) and report characteristics (e.g., years considered, language, publication status) to be used as criteria for eligibility for the review                   | x                    | <input type="checkbox"/> | 128-145        |
| <b>Information sources</b>                | 9   | Describe all intended information sources (e.g., electronic databases, contact with study authors, trial registers, or other grey literature sources) with planned dates of coverage                                                        | x                    | <input type="checkbox"/> | 146-203        |
| <b>Search strategy</b>                    | 10  | Present draft of search strategy to be used for at least one electronic database, including planned limits, such that it could be repeated                                                                                                  | x                    | <input type="checkbox"/> | 146-203        |
| <b>STUDY RECORDS</b>                      |     |                                                                                                                                                                                                                                             |                      |                          |                |
| Data management                           | 11a | Describe the mechanism(s) that will be used to manage records and data throughout the review                                                                                                                                                | x                    | <input type="checkbox"/> | 206-212        |
| Selection process                         | 11b | State the process that will be used for selecting studies (e.g., two independent reviewers) through each phase of the review (i.e., screening, eligibility, and inclusion in meta-analysis)                                                 | x                    | <input type="checkbox"/> | 214-221        |
| Data collection process                   | 11c | Describe planned method of extracting data from reports (e.g., piloting forms, done independently, in duplicate), any processes for obtaining and confirming data from investigators                                                        | x                    | <input type="checkbox"/> | 223-245        |
| <b>Data items</b>                         | 12  | List and define all variables for which data will be sought (e.g., PICO items, funding sources), any pre-planned data assumptions and simplifications                                                                                       | x                    | <input type="checkbox"/> | 247-258        |
| <b>Outcomes and prioritization</b>        | 13  | List and define all outcomes for which data will be sought, including prioritization of main and additional outcomes, with rationale                                                                                                        | x                    | <input type="checkbox"/> | 254-258        |
| <b>Risk of bias in individual studies</b> | 14  | Describe anticipated methods for assessing risk of bias of individual studies, including whether this will be done at the outcome or study level, or both; state how this information will be used in data synthesis                        | x                    | <input type="checkbox"/> | 260-286        |
| <b>DATA</b>                               |     |                                                                                                                                                                                                                                             |                      |                          |                |
| <b>Synthesis</b>                          | 15a | Describe criteria under which study data will be quantitatively synthesized                                                                                                                                                                 | x                    | <input type="checkbox"/> | 288-298        |
|                                           | 15b | If data are appropriate for quantitative synthesis, describe planned summary measures, methods of handling data, and methods of combining data from studies, including any planned exploration of consistency (e.g., $I^2$ , Kendall's tau) | x                    | <input type="checkbox"/> | 288-298        |
|                                           | 15c | Describe any proposed additional analyses (e.g., sensitivity or subgroup analyses, meta-regression)                                                                                                                                         | x                    | <input type="checkbox"/> | 294-295        |
|                                           | 15d | If quantitative synthesis is not appropriate, describe the type of summary planned                                                                                                                                                          | x                    | <input type="checkbox"/> | 288-298        |
| <b>Meta-bias(es)</b>                      | 16  | Specify any planned assessment of meta-bias(es) (e.g., publication bias across studies, selective reporting within studies)                                                                                                                 | x                    | <input type="checkbox"/> | 305-328        |
| <b>Confidence in cumulative evidence</b>  | 17  | Describe how the strength of the body of evidence will be assessed (e.g., GRADE)                                                                                                                                                            | x                    | <input type="checkbox"/> | 260-286        |
