# Supplementary material for: Effectiveness and feasibility of internet-based and mobile-based interventions for individuals experiencing bereavement: a systematic review protocol
Source: PubMed Central journal article supplement — BMJ Open. 2020 Apr 22;10(4):e036034. doi: 10.1136/bmjopen-2019-036034 (PMC7204864; doi:10.1136/bmjopen-2019-036034), 2020-04-22
Supplement: bmjopen-2019-036034supp001.pdf [file bmjopen-2019-036034supp001.pdf]


 PubMed

US National Library of Medicine National Institutes of Health
 [Advanced](#)
[Help](#)

### Search Details

#### Query Translation:

```
(("bereavement"[MeSH Terms] OR "bereavement"[All Fields]) OR ("widowhood"[MeSH Terms] OR "widowhood"[All Fields]) OR ("grief"[MeSH Terms] OR "grief"[All Fields])) AND (online[All Fields] OR web[All Fields] OR ("computers"[MeSH Terms] OR "computers"[All Fields] OR "computer"[All Fields]) OR mobile[All Fields] OR e-health[All Fields] OR ("internet"[MeSH Terms] OR "internet"[All Fields])) AND (("methods"[MeSH Terms] OR "methods"[All Fields] OR "intervention"[All Fields]) OR ("psychotherapy"[MeSH Terms] OR "psychotherapy"[All Fields]) OR ("cognitive behavioral therapy"[MeSH Terms] OR ("cognitive"[All Fields] AND "behavioral"[All
```

#### Result:

273

#### Translations:

|                               |                                                                                                                                                                                                                                                                                                                   |
|-------------------------------|-------------------------------------------------------------------------------------------------------------------------------------------------------------------------------------------------------------------------------------------------------------------------------------------------------------------|
| bereavement                   | "bereavement"[MeSH Terms] OR "bereavement"[All Fields]                                                                                                                                                                                                                                                            |
| widowhood                     | "widowhood"[MeSH Terms] OR "widowhood"[All Fields]                                                                                                                                                                                                                                                                |
| grief                         | "grief"[MeSH Terms] OR "grief"[All Fields]                                                                                                                                                                                                                                                                        |
| computer                      | "computers"[MeSH Terms] OR "computers"[All Fields] OR "computer"[All Fields]                                                                                                                                                                                                                                      |
| internet                      | "internet"[MeSH Terms] OR "internet"[All Fields]                                                                                                                                                                                                                                                                  |
| intervention                  | "methods"[MeSH Terms] OR "methods"[All Fields] OR "intervention"[All Fields]                                                                                                                                                                                                                                      |
| psychotherapy                 | "psychotherapy"[MeSH Terms] OR "psychotherapy"[All Fields]                                                                                                                                                                                                                                                        |
| cognitive behavioural therapy | "cognitive behavioral therapy"[MeSH Terms] OR ("cognitive"[All Fields] AND "behavioral"[All Fields] AND "therapy"[All Fields]) OR "cognitive behavioural therapy"[All Fields] OR ("cognitive"[All Fields] AND "behavioural"[All Fields] AND "therapy"[All Fields]) OR "cognitive behavioural therapy"[All Fields] |

#### Database:

PubMed

#### User query:

(bereavement OR widowhood OR grief) AND (online OR web OR computer OR mobile OR e-health OR internet) AND (intervention OR psychotherapy OR cognitive behavioural therapy OR CBT)
